# Supplementary material for: Comprehensive genomic signature of pyroptosis-related genes and relevant characterization in hepatocellular carcinoma
Source: PeerJ. 2023 Jan 12;11:e14691. doi: 10.7717/peerj.14691 (PMC9840857; doi:10.7717/peerj.14691)
Supplement: Supplemental Information 2 [file peerj-11-14691-s002.xls]

## Sheet: PRGS-Huh7
	actin	CYP2C9	Ct	2^(-Ct)	Ave
LO2	14.1234	24.2949	10.1715	0.000867124	0.000973275	0.890935
	14.2429	24.1999	9.95695	0.00100614		1.03377
	13.9079	23.808	9.90013	0.00104656		1.0753
Huh7	13.846	25.7867	11.9407	0.000254391		0.261376
	13.867	25.6604	11.7934	0.000281727		0.289463
	13.7269	25.4285	11.7016	0.000300232		0.308476
	actin	MYBL2
LO2	14.118	27.0366	12.9186	0.000129155	0.000140015	0.922434
	14.3651	27.0433	12.6782	0.000152573		1.08968
	14.0412	26.8609	12.8197	0.000138318		0.987881
Huh7	14.2458	25.9418	11.696	0.000301407		2.15267
	14.3608	25.8017	11.4408	0.000359721		2.56915
	14.2995	26.0388	11.7393	0.000292493		2.08901
	actin	SPP1
LO2	14.4975	26.8227	12.3251	0.000194881	0.00019314	1.00901
	14.4735	26.7863	12.3128	0.000196551		1.01766
	14.412	26.789	12.3771	0.000187987		0.973323
Huh7	14.4462	24.6702	10.2239	0.000836154		4.32927
	14.5493	24.7126	10.1633	0.000872063		4.51519
	14.4417	24.5261	10.0845	0.000921025		4.7687
	actin	CTSV
LO2	14.0844	22.3205	8.23603	0.00331671	0.00355049	0.934156
	14.1303	22.1507	8.02042	0.00385134		1.08474
	14.0768	22.242	8.16528	0.00348342		0.981109
Huh7	13.8952	20.6274	6.73218	0.00940616		2.64926
	13.9682	20.7135	6.74535	0.00932069		2.62518
	14.0386	20.3136	6.27497	0.0129136		3.63712
	actin	EPO
LO2	14.3558	20.8375	6.48173	0.0111893	0.0113046	0.989802
	14.1996	20.7249	6.52535	0.0108561		0.960329
	14.4863	20.883	6.39674	0.0118684		1.04987
Huh7	14.0265	19.3416	5.31501	0.0251201		2.22211
	14.0845	19.546	5.46141	0.0226961		2.00769
	14.1949	19.5897	5.3948	0.0237685		2.10256

## Sheet: PRGS-HepG2
	actin	CYP2C9	Ct	2^(-Ct)	Ave
LO2	14.2462	25.1856	10.9394	0.000509217	0.000534749	0.952253
	14.2382	25.0682	10.8301	0.000549318		1.02725
	14.2513	25.0908	10.8396	0.000545712		1.0205
HepG2	14.0127	26.6159	12.6032	0.000160718		0.300548
	13.9492	26.6513	12.7021	0.000150062		0.280622
	14.1063	26.6361	12.5298	0.000169099		0.316221
	actin	MYBL2
LO2	14.2514	28.1056	13.8542	6.75253e-05	6.47053e-05	1.04358
	14.1432	28.189	14.0458	5.91296e-05		0.91383
	14.2556	28.1112	13.8556	6.74609e-05		1.04259
HepG2	14.394	27.251	12.8569	0.000134795		2.08322
	14.3379	27.3657	13.0277	0.000119745		1.85062
	14.3884	27.3216	12.9333	0.00012785		1.97588
	actin	SPP1
LO2	14.5066	27.5994	13.0928	0.000114463	0.000117423	0.974794
	14.4803	27.4307	12.9504	0.000126341		1.07595
	14.2792	27.4104	13.1311	0.000111464		0.949254
HepG2	14.1365	25.4651	11.3286	0.000388825		3.31132
	14.1077	25.599	11.4912	0.000347373		2.95831
	14.0191	25.4764	11.4573	0.000355641		3.02872
	actin	CTSV
LO2	14.4288	23.2086	8.77977	0.00227523	0.00216221	1.05227
	14.4529	23.3128	8.85986	0.00215237		0.995447
	14.36	23.2838	8.92381	0.00205904		0.952285
HepG2	14.587	21.9801	7.39304	0.00594941		2.75154
	14.6518	22.0762	7.42439	0.0058215		2.69238
	14.6852	22.0542	7.36897	0.00604951		2.79784
	actin	EPO
LO2	14.1235	21.5606	7.43709	0.00577051	0.00583242	0.989385
	13.9105	21.3868	7.47628	0.00561587		0.962871
	14.0134	21.3678	7.3544	0.00611088		1.04774
HepG2	14.1167	20.5295	6.41288	0.0117363		2.01225
	14.0888	20.478	6.38917	0.0119307		2.04559
	14.1756	20.5281	6.35253	0.0122376		2.09821
